# Supplementary material for: Aggregation-induced emission, mechanochromism and blue electroluminescence of carbazole and triphenylamine-substituted ethenes
Source: Royal Society of Chemistry journal article supplement (doi:10.1039/c4tc00097h), 2014-01-01
Supplement: c4tc00097h1.pdf [file c4tc00097h1.pdf]

*Supporting Information*

**Aggregation-Induced Emission, Mechanochromism and  
Blue Electroluminescence of Carbazole and  
Triphenylamine-Substituted Ethenes**

Carrie Yin Kwan Chan,<sup>a</sup> Jacky Wing Yip Lam,<sup>a</sup> Zujin Zhao,<sup>b</sup> Shuming Chen,<sup>c</sup> Ping  
Lu,<sup>d</sup> Herman Ho Yung Sung,<sup>a</sup> Hoi Sing Kwok,<sup>c</sup> Yuguang Ma,<sup>d</sup> Ian D. Williams,<sup>a</sup> and  
Ben Zhong Tang<sup>a,b,e,f,\*</sup>

<sup>a</sup>Department of Chemistry, Institute for Advanced Study, Institute of Molecular  
Functional Materials, Division of Life Science, Division of Biomedical Engineering  
and State Key Laboratory of Molecular Neuroscience, The Hong Kong University of  
Science & Technology, Clear Water Bay, Kowloon, Hong Kong, China

<sup>b</sup>State Key Laboratory of Luminescent Materials and Devices, South China University  
of Technology (SCUT), Guangzhou 510640, China

<sup>c</sup>Center for Display Research, The Hong Kong University of Science & Technology,  
Clear Water Bay, Kowloon, Hong Kong, China

<sup>d</sup>State Key Laboratory of Supermolecular Structure and Materials, Jilin University,  
Changchun 150012, China

<sup>e</sup>Guangdong Innovative Research Team, SCUT-HKUST Joint Research Laboratory, ,  
South China University of Technology (SCUT), Guangzhou 510640, China

<sup>f</sup>HKUST-Shenzhen Research Institute no. 9 Yuexing 1st RD, South Area, Hi-tech  
Park, Nanshan, Shenzhen 518057, China

**Table of Contents**

**Table S1.** Summary of crystal data and intensity collection parameters for **1–3**.

**Figure S1.** (A) PL spectra of **2** in THF and THF/H<sub>2</sub>O mixtures with different water fractions. Concentration: 10<sup>-5</sup> M; excitation wavelength: 340 nm. (B) Plot of  $I/I_0$  values versus the compositions of the THF/H<sub>2</sub>O mixtures of **2**.

**Figure S2.** (A) PL spectra of **3** in THF and THF/H<sub>2</sub>O mixtures with different water fractions. Concentration: 10<sup>-5</sup> M; excitation wavelength: 350 nm. (B) Plot of  $I/I_0$  values versus the compositions of the THF/H<sub>2</sub>O mixtures of **3**.

**Figure S3.** Effect of grinding and fuming on the XRD diffractogram of crystals of **3**.

**Table S1.** Summary of crystal data and intensity collection parameters for **1–3**.

|                                                   | 1                                 | 2                                 | 3                                 |
|---------------------------------------------------|-----------------------------------|-----------------------------------|-----------------------------------|
| Empirical formula                                 | C <sub>32</sub> H <sub>23</sub> N | C <sub>38</sub> H <sub>35</sub> N | C <sub>38</sub> H <sub>29</sub> N |
| Formula weight                                    | 421.51                            | 505.67                            | 499.62                            |
| Crystal dimensions, mm                            | 0.35 x 0.25 x 0.12                | 0.25 x 0.09 x 0.07                | 0.35 x 0.28 x 0.16                |
| Crystal system                                    | Triclinic                         | Monoclinic                        | Triclinic                         |
| Space group                                       | P-1                               | P2(1)                             | P -1                              |
| a, Å                                              | 12.7827(12)                       | 12.5655(5)                        | 10.9230(6)                        |
| b, Å                                              | 12.9142(10)                       | 8.9233(3)                         | 11.5156(6)                        |
| c, Å                                              | 16.2498(11)                       | 14.0093(5)                        | 12.0082(7)                        |
| α, deg                                            | 92.293(6)                         | 90                                | 98.178(4)                         |
| β, deg                                            | 107.582(7)                        | 114.622(4)                        | 98.136(5)                         |
| γ, deg                                            | 112.892(8)                        | 90                                | 108.704(5)                        |
| V, Å <sup>3</sup>                                 | 2317.6(3)                         | 1427.98(9)                        | 1387.63(13)                       |
| Z                                                 | 4                                 | 2                                 | 2                                 |
| D <sub>calcd.</sub> , gcm <sup>3</sup>            | 1.208                             | 1.176                             | 1.196                             |
| F <sub>000</sub>                                  | 888                               | 540                               | 528                               |
| Temp, (K)                                         | 173(2)                            | 143                               | 173                               |
| Radiation (λ), Å                                  | 1.54178                           | 1.5418                            | 1.5418                            |
| μ (Mo Kα) mm <sup>-1</sup>                        | 0.529                             | 0.506                             | 0.520                             |
| 2θ <sub>max</sub> , deg (completeness)            | 66.5 (97.2%)                      | 66.5 (97.6%)                      | 66.5 (99.0%)                      |
| No. of collected reflns.                          | 13991                             | 5028                              | 9505                              |
| No. of unique reflns. (R <sub>int</sub> )         | 8118 (0.0563)                     | 2680 (0.0229)                     | 4949 (0.0614)                     |
| Data/restraints/parameters                        | 8118/0/595                        | 2680/7/351                        | 4949/0/352                        |
| R <sub>1</sub> , wR <sub>2</sub> [obs I > 2σ (I)] | 0.0447, 0.0765                    | 0.0523, 0.1404                    | 0.0472, 0.1322                    |
| R <sub>1</sub> , wR <sub>2</sub> (all data)       | 0.0829, 0.0817                    | 0.0547, 0.1430                    | 0.0518, 0.1373                    |
| Residual peak/hole e. Å <sup>-3</sup>             | 0.233/-0.216                      | 0.372/ -0.248                     | 0.204/-0.213                      |
| Transmission ratio                                | 1.00/0.96                         | 1.00/0.30                         | 1.00/0.65                         |
| Goodness-of-fit on F <sup>2</sup>                 | 1.014                             | 1.054                             | 0.991                             |

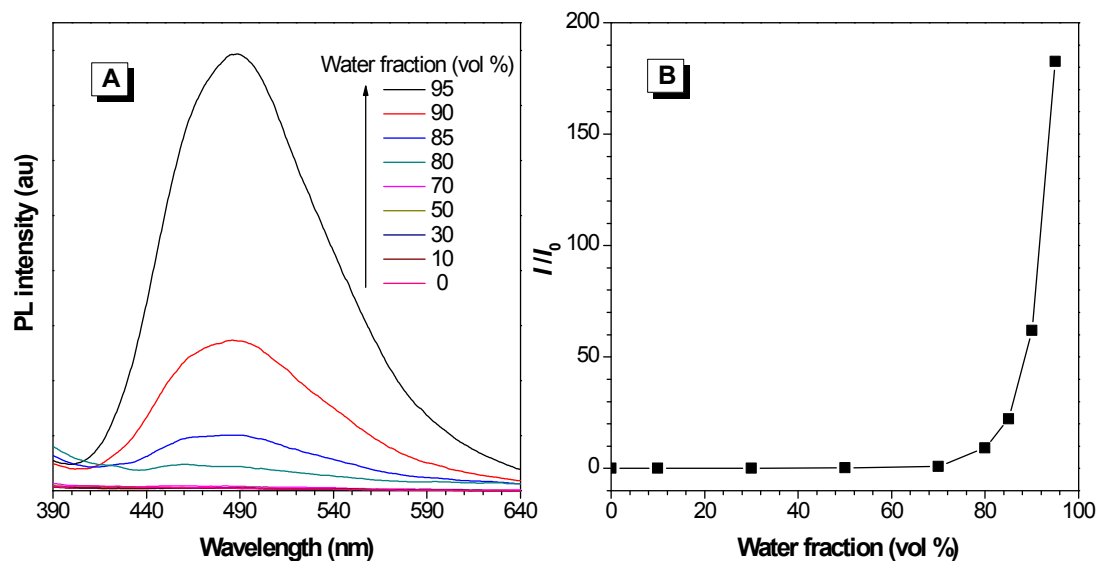

**Figure S1.** (A) PL spectra of **2** in THF and THF/H<sub>2</sub>O mixtures with different water fractions. Concentration:  $10^{-5}$  M; excitation wavelength: 340 nm. (B) Plot of  $I/I_0$  values versus the compositions of the THF/H<sub>2</sub>O mixtures of **2**.

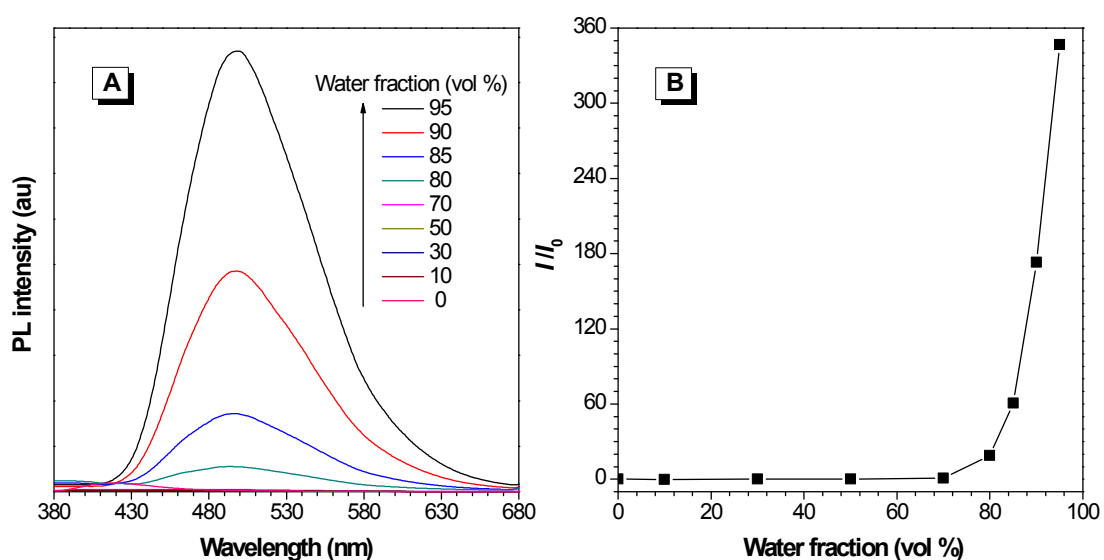

**Figure S2.** (A) PL spectra of **3** in THF and THF/H<sub>2</sub>O mixtures with different water fractions. Concentration:  $10^{-5}$  M; excitation wavelength: 350 nm. (B) Plot of  $I/I_0$  values versus the compositions of the THF/H<sub>2</sub>O mixtures of **3**.

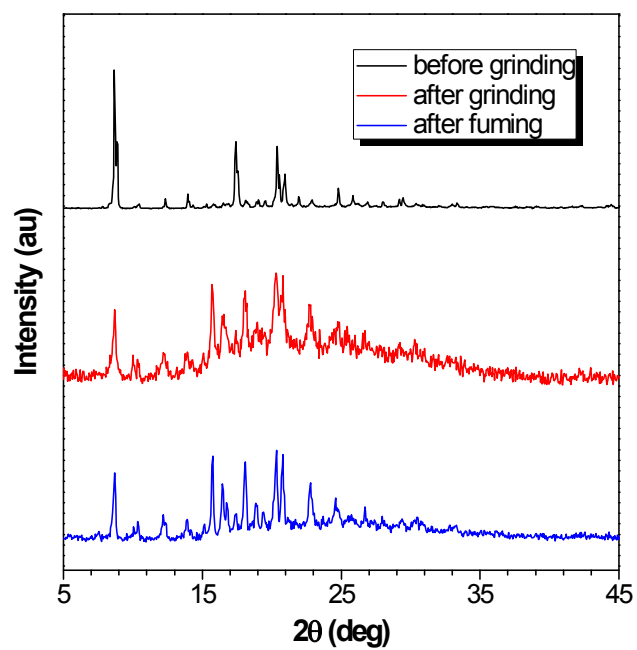

**Figure S3.** Effect of grinding and fuming on the XRD diffractogram of crystals of **3**.
